# Supplementary material
Source: publisher site journal article supplement (https://www.dovepress.com/article/385040)
Supplement: Supplementary file 1 [file get_supplementary_file.php]

**Questionnaire (Supplementary Information)**

**Part One: OSDI Survey**

1. Have you experienced sensitive eyes to light during the last week?

- Never
- Some time
- Half of the time
- Most of the time
- All the time

1. Have you experienced gritty eyes during the last week?

- Never
- Some time
- Half of the time
- Most of the time
- All the time

1. Have you experienced painful or sore eyes during the last week?

- Never
- Some time
- Half of the time
- Most of the time
- All the time

1. Have you experienced blurred vision during the last week?

- Never
- Some time
- Half of the time
- Most of the time
- All the time

1. Have you experienced poor vision during the last week?

- Never
- Some time
- Half of the time
- Most of the time
- All the time

1. Have problems with your eyes limited you in reading during the last week?

- Never
- Some time
- Half of the time
- Most of the time
- All the time
- Not applicable

1. Have problems with your eyes limited you in night driving during the last week?

- Never
- Some time
- Half of the time
- Most of the time
- All the time
- Not applicable

1. Have problems with your eyes limited you in working with a computer or bank machine (ATM) during the last week?

- Never
- Some time
- Half of the time
- Most of the time
- All the time
- Not applicable

1. Have problems with your eyes limited you in watching TV during the last week?

- Never
- Some time
- Half of the time
- Most of the time
- All the time
- Not applicable

1. Have your eyes felt uncomfortable in windy conditions during the last week?

- Never
- Some time
- Half of the time
- Most of the time
- All the time
- Not applicable

1. Have your eyes felt uncomfortable in low humidity areas (very dry) during the last week?

- Never
- Some time
- Half of the time
- Most of the time
- All the time
- Not Applicable

1. Have your eyes felt uncomfortable in air-conditioned areas during the last week?

- Never
- Some time
- Half of the time
- Most of the time
- All the time
- Not applicable

**Part Two: Smoking**

1. What type of tobacco do you currently smoke?

- Regular Cigarette
- Electronic cigarette
- Waterpipe (Mouassal)
- Waterpipe (Ajami)
- Mixed
- Non smoker

1. How often do you smoke tobacco?

- Daily smoking (at least 5 days per week)
- Weekly smoking (1-2 days per week)
- Monthly smoking (1-2 days per month)
- Non smoker

1. Where often do you smoke tobacco?

- Indoor areas
- Outdoor areas
- Non smoker

1. For how many years have you smoked tobacco? (Answer by zero if you are a non-smoker) (open-ended question)
2. On average, how many cigarettes (regular and/or electronic cigarettes) do you smoke per week? (Answer by zero if you are a non-smoker) (open-ended question)
3. On average, how many water pipes (Ajami and/or Mouassal) do you smoke per week? (Answer by zero if you are a non-smoker) (open-ended question)

**Part Three: Eye Cosmetics**

1. What type of cosmetics do you currently use?

- Mascara
- Eyeliner (inside the eye)
- Eyeliner(outside the eye
- Eye shadow
- Anti-aging cream
- Adhesive lashes
- I don’t use eye cosmetics

1. How often do you use eye cosmetics?

- Daily use (at least 5 days per week)
- Weekly use (1-2 days per week)
- Monthly use (1-2 days per month)
- I don’t use eye cosmetics

1. What is the duration (in hours/day) of eye cosmetic use?

- Less than 6 hours
- Between 6 and 12 hours
- More than 12 hours
- I don’t use eye cosmetics

1. Which cleaning material is used to remove eye cosmetics?

- Water only
- Water with soap
- Cleansing cream
- I don’t use eye cosmetics

1. How often do you clean your eye cosmetics (before sleeping)?

- Never
- Sometimes
- Always
- I don’t use eye cosmetics
